# Supplementary material for: NMR characterization of RNA binding property of the DEAD-box RNA helicase DDX3X and its implications for helicase activity
Source: PubMed Central journal article supplement (PMC11045745; doi:10.1038/s41467-024-47659-w), 2024-04-25
Supplement: 41467_2024_47659_MOESM3_ESM.pdf [file 41467_2024_47659_MOESM3_ESM.pdf]

## **Description of additional supplementary files**

**Supplementary Data 1:** DNA sequence of DDX3X constructs and primers
